# Supplementary material for: Molecular Characterization and Genetic Diversity of Clade E-Human Head Lice from Guinea
Source: Preprints.org preprint supplement (doi:10.20944/preprints202012.0454.v1), 2020-12-18
Supplement: Supplementary file 3 [file supplementary]

## Sheet: Cytb
Haplotypes	Africa															Asia												Europe					Oceania			America											Total	Accession number	Head or Body
	Algeria	Burundi	Ethiopia	Kenya	Madagascar	Rwanda	Senegal	Egypt	South Africa	Mali	DR Congo	CongoBraz	Niger	Gabon	Guinea	China	Iran	Japan	Laos	Mongolia	Nepal	Phillippines	Russia	Taiwan	Yemen	Pakistan	Israel	France	Germany	Hungary	Portugal	United Kingdom	Australia	New Zelande	Papua-new-guinea	Colombia	Amazonia	Brazil	Canada	Ecuador	Honduras	Mexico	Panama	Peru	USA	Chille
A1					1																																										1	KM579538	B
A2																							1																								1	KM579539	B
A3																																												1			1	KM579540	B
A4																																													4		4	KM579541	B
A5		18	21	7	17	13		91			28	24		11			2		1	1	45	5	27		1	9	7	95	4	10	4		38	10	17	2	1	10		1	3	1	1	9	34	1	569	KM579542	H&B
A6			3																																												3	KM579543	B
A7																																												1			1	KM579544	B
A8																							1						2																		3	KM579545	B
A9			1																																												1	KM579546	B
A10																					20																										20	KM579547	B
A11																		10																													10	KM579548	B
A12																																			1				7			8					16	KM579549	H&B
A13																6				5																											11	KM579550	H&B
A14																							1																								1	KM579551	H&B
A16																						9											9														18	KM579552	H
A17	2						72					64		306								1						5				4	10	6											8		478	KM579553	H&B
A18																																					2										2	KM579554	H
A19																								1																							1	KM579555	H
A45																					1																										1	KM579566	B
A55																											4																				4	KX232678	H
A56																											1																				1	KX232679	H
A57												5																																			5	KX444540	H
A58												4																																			4	KX444541	H
A59												1																																			1	KX444542	H
A60																												5																			5	MF672001	H
A61																												2																			2	MF672010	H
A62																												1																			1	MF672003	H
A63																																					9										9	MH429036	H
A64																																					2										2	MH429037	H
A65																																					3										3	MH429038	H
A66											7																																				7	MH230928	H
A67											2																																				2	MH230927	H
A68											2																																				2	MH230926	H
A69											1																																				1	MH230925	H
A70											1																	1																			2	MN635432	H
A71																												1																			1	MN635433	H
A72														1																																	1	MN515375	H
A73														1																																	1	MN515376	H
A70-I											1																																				1	MH117941	H B
A71-I											1																																				1	MH117942	H B
A72-I											2																																				2	MH117943	H B
A73-I											2																																				2	MH117944	H B
A74														1																																	1	MN515377	H
A75														1																																	1	MN515378	H
A76														1																																	1	MN515370	H
A77														1																																	1	MN515371	H
A78														2																																	2	MN515372	H
B31																												1																			1	KX249763	H
B32																																									1						1	KM579556	H
B33																																									5	1			16		22	KM579557	H
B34																																													2		2	KM579558	H
B36	24								59																		8	32	3			28									1				20	1	176	KM579559	H
B45																												1																			1	KX249764	H
B37																																									1						1	KX249776	H
B38																																									1						1	KX249777	H
B39																												4																			4	MF672004	H
B40																												2																			2	MN635434	H
F54																																					89										89	MH429039	H
F1																																					5										5	MH429040	H
F2																																					1										1	MH429041	H
F3																																					2										2	MH429042	H
F4																																					1										1	MH429043	H
F5																																					1										1	MH429044	H
F6																																					1										1	MH429045	H
F7																																					3										3	MH429046	H
C40			1																																												1	KM579561	H
C41																					17					79		2																			98	KM579562	H
C42			7																																												7	KM579563	H
C43			1																																												1	KM579564	H
C44			51																																												51	KM579565	H
C51																												1																			1	KX249765	H
C45																										1																					1	KX249778	H
C74												32		13																																	45	KX444547	H
C75												6		4																																	10	KX444548	H
C76												3																																			3	KX444549	H
C77												2																																			2	KX444550	H
C78												1																																			1	KX444551	H
C79												1																																			1	KX444552	H
C80														1																																	1	MN515373	H
E39							39			14					96																																149	KM579560	H
E46										22				1																																	23	KX249780	H
E47										15																																					15	KX249781	H
E48							1			15					12																																28	KY937987	H
E50										1																																					1	KY937989	H
E51										1																																					1	KY937990	H
E52													3																																		3	MH429047	H
E53													32																																		32	MH429048	H
E54													1																																		1	MH429049	H
E55													1																																		1	MH429050	H
E56																												9																			9	MF672005	H
E57																												3																			3	MF672006	H
E58																												1																			1	MF672007	H
E59																												7																			7	MF672008	H
E60																												1																			1	MF672009	H
E62											10																																				10	MH230921	H
E64																												2																			2	MG759553	H
E66																												1																			1	MG759555	H
E67																												1																			1	MG759556	H
E68															10																																10	MT981014	H
E69															8																																8	MT981015	H
E70															1																																1	MT981016	H
E71															1																																1	MT981017	H
E72															1																																1	MT981018	H
E73															12																																12	MT981019	H
D60											5	3																																			8	KX249766	B
D61											2																																				2	KX249767	B
D62											2																																				2	KX249768	B
D63											3																																				3	KX249769	H
D64											2																																				2	KX249770	H
D65											12	11																																			23	KX249771	H
D66											4																																				4	KX249772	H
D67											20																																				20	KX249773	H B
D68			1																																												1	KX249779	H
D69			3																																												3	KX249774	B
D70			1																																												1	KX249775	H
D71												4																																			4	KX444544	H
D72												1																																			1	KX444545	H
D73												2																																			2	KX444546	H
D74												4																																			4	MH230924	H
D75												1																																			1	MH230923	H
D76												8																																			8	MH230922	H
D77											1																																				1	MH117945	B
D78											1																																				1	MH117946	H
D79											1																																				1	MH117947	B
D80											1																																				1	MH117948	B
D81											1																																				1	MH117949	H
D82											1																																				1	MH117950	H
D83											1																																				1	MH117951	B
D84											1																																				1	MH117952	B
D85											1																																				1	MH117953	H
	26	18	90	7	18	13	112	91	59	68	107	177	37	344	141	6	2	10	1	6	83	15	30	1	1	89	20	178	9	10	4	32	57	16	18	2	120	10	7	1	12	10	1	11	84	2	2156
[truncated: 1 more columns]
